# Supplementary material
Source: Frontiers journal article supplement (https://www.frontiersin.org/articles/504432)
Supplement: Table_1.PDF [file Table_1.PDF]

**Supplementary Table 1. CFAs for all 3 studies**

| Measure      | $\chi^2$ | df    | p      | CFI | TLI  | RMSEA [95% CI] | SRMR |
|--------------|----------|-------|--------|-----|------|----------------|------|
| Study 1      |          |       |        |     |      |                |      |
| NEG          | 335.38   | 22    | < .001 | .85 | .94  | .19 [.17, .21] | .07  |
| NEG (mod)    | 29.29    | 8     | < .001 | .99 | .99  | .08 [.04, .13] | .02  |
| Stress       | 436.87   | 13    | < .001 | .75 | .79  | .28 [.26, .30] | .12  |
| Stress (mod) | 23.48    | 8     | .003   | .99 | .99  | .07 [.02, .12] | .02  |
| WM           | 30.66    | 23    | .131   | .97 | .97  | .03 [.00, .05] | .09  |
| WM (mod)     | 10.67    | 12    | .557   | 1   | 1    | .00 [.00, .05] | .05  |
| SC           | 272.52   | 42    | < .001 | .78 | .87  | .12 [.10, .13] | .07  |
| SC (mod)     | 31.08    | 17    | .020   | .98 | .99  | .05 [.00, .08] | .03  |
| CR           | 10.28    | 8     | .246   | 1   | 1    | .03 [.00, .07] | .04  |
| FL           | 11.65    | 8     | .168   | .99 | .99  | .03 [.00, .08] | .05  |
| Study 2      |          |       |        |     |      |                |      |
| NEG          | 315.14   | 22    | < .001 | .89 | .96  | .16 [.14, .18] | .07  |
| NEG (mod)    | 73.47    | 8     | < .001 | .98 | .98  | .13 [.10, .17] | .03  |
| Stress       | 458.59   | 20    | < .001 | .81 | .90  | .21 [.19, .23] | .08  |
| Stress (mod) | 56.33    | 8     | < .001 | .98 | .99  | .12 [.07, .16] | .03  |
| WM           | 75.76    | 17    | < .001 | .96 | .96  | .09 [.07, .10] | .11  |
| WM (mod)     | 14.81    | 7     | .039   | 1   | .99  | .05 [.00, .09] | .05  |
| SC           | 287.16   | 41    | < .001 | .80 | .85  | .11 [.10, .12] | .07  |
| SC (mod)     | 94.36    | 16    | < .001 | .89 | .90  | .10 [.08, .12] | .05  |
| CR           | 19.73    | 8     | .011   | .99 | .99  | .06 [.02, .09] | .04  |
| FL           | 34.65    | 18    | .010   | .97 | .96  | .04 [.02, .07] | .06  |
| FL (mod)     | 29.63    | 13    | .005   | .97 | .96  | .05 [.02, .08] | .06  |
| Study 3      |          |       |        |     |      |                |      |
| Stress       | 135.01   | 21    | < .001 | .88 | .92  | .15 [.13, .18] | .07  |
| Stress (mod) | 18.86    | 7     | .009   | .99 | .98  | .08 [.03, .15] | .03  |
| WM           | 57.80    | 10.29 | < .001 | .87 | .84  | .14 [.10, .18] | .14  |
| WM (mod)     | 8.00     | 2.67  | .035   | .98 | .96  | .09 [.00, .20] | .05  |
| SC           | 201.05   | 33    | < .001 | .66 | .68  | .15 [.13, .16] | .10  |
| SC (mod)     | 65.73    | 15    | < .001 | .86 | .84  | .12 [.09, .15] | .07  |
| CR           | 6.38     | 8     | .605   | 1   | 1.01 | .00 [.00, .07] | .05  |
| FL           | 23.89    | 17    | .123   | .92 | .90  | .04 [.00, .08] | .08  |
| FL (mod)     | 14.29    | 13    | .354   | .99 | .98  | .02 [.00, .07] | .07  |

Note: (mod) = denotes a modified version of the scale (based on the exploratory analysis); NEG = negative affect; Stress = perceived stress; WM = working memory; SC = self-control; CR = cognitive reflection; FL = financial literacy

## Sensitivity analysis

Below you can find the summary of the results of the regression estimates and model fits obtained by the sensitivity analysis based on the different measurement models for all 3 studies (24 estimated models in total). For the specific results please see <https://osf.io/r97mt/>

**Supplementary Table 2. Summary of the standardized regression coefficients ( $\beta$ ) obtained by the sensitivity analysis**

| Regressions:  | Min   | Max  | Range |
|---------------|-------|------|-------|
| subjPoverty ~ |       |      |       |
| houseInc      | .21   | .60  | .39   |
| NEG ~         |       |      |       |
| subjPoverty   | -.94  | -.27 | .67   |
| STRESS ~      |       |      |       |
| subjPoverty   | -.98  | -.24 | .74   |
| WM ~          |       |      |       |
| NEG           | -.18  | .54  | .72   |
| STRESS        | -.65  | -.08 | .57   |
| SELFC ~       |       |      |       |
| NEG           | -.55  | .72  | 1.27  |
| STRESS        | -1.20 | -.03 | 1.17  |
| CR ~          |       |      |       |
| WM            | -.07  | .61  | .68   |
| SELFC         | -.18  | .32  | .50   |
| TD 1 ~        |       |      |       |
| CR            | .08   | .23  | .15   |
| SELFC         | -.04  | .05  | .09   |
| FL            | .13   | .29  | .16   |
| RR ~          |       |      |       |
| CR            | -.01  | .08  | .09   |
| SELFC         | -.06  | .11  | .17   |
| FL            | -.01  | .15  | .16   |
| RL ~          |       |      |       |
| CR            | -.21  | .08  | .29   |
| SELFC         | -.13  | .01  | .14   |
| FL            | -.11  | .00  | .11   |
| TD 2 ~        |       |      |       |
| CR            | -.29  | -.14 | .15   |
| SELFC         | .03   | .13  | .10   |
| FL            | -.22  | -.15 | .07   |
| TD 3 ~        |       |      |       |
| CR            | .10   | .18  | .08   |
| SELFC         | .03   | .09  | .06   |
| FL            | .52   | .55  | .03   |

Note: NEG = negative affect; STRESS = perceived stress; WM = working memory; SELFC = self-control; CR = cognitive reflection; TD 1 = staircase model of time-discounting; TD 2 = IMCQ measure of time-discounting; TD 3 = time-discounting with a real monetary reward (ordered categorical); Risk-R = staircase model of risk preference when a reward is involved; Risk-L = staircase model of risk preference when a loss is involved; FL = financial literacy

**Supplementary Table 3. Summary of the chi-square statistics and AFI obtained by the sensitivity analysis**

| Model                  | $\chi^2$ | df     | p      | CFI | TLI | RMSEA [95% CI] | SRMR |
|------------------------|----------|--------|--------|-----|-----|----------------|------|
| <b>CFA-based items</b> |          |        |        |     |     |                |      |
| Study 1                |          |        |        |     |     |                |      |
| Initial                | 839.95   | 169    | < .001 | .81 | .86 | .10 [.09, .10] | .11  |
| W/ cov.                | 535.10   | 169    | < .001 | .90 | .92 | .07 [.07, .08] | .10  |
| W/o FL                 | 355.89   | 155    | < .001 | .95 | .96 | .06 [.05, .06] | .07  |
| Study 2                |          |        |        |     |     |                |      |
| Initial                | 1051.63  | 189    | < .001 | .82 | .87 | .10 [.09, .10] | .10  |
| W/ cov.                | 717.12   | 189    | < .001 | .89 | .92 | .08 [.07, .08] | .10  |
| W/o FL                 | 532.04   | 170    | < .001 | .92 | .95 | .07 [.06, .07] | .08  |
| Study 3                |          |        |        |     |     |                |      |
| Initial                | 304.87   | 124.34 | < .001 | .75 | .77 | .08 [.07, .08] | .13  |
| W/o FL                 | 263.39   | 105.92 | < .001 | .81 | .83 | .08 [.07, .09] | .11  |
| <b>All items</b>       |          |        |        |     |     |                |      |
| Study 1                |          |        |        |     |     |                |      |
| Initial                | 906.26   | 207    | < .001 | .80 | .85 | .09 [.09, .09] | .10  |
| W/ cov.                | 690.01   | 207    | < .001 | .86 | .90 | .08 [.07, .08] | .10  |
| W/o FL                 | 592.29   | 195    | < .001 | .89 | .92 | .07 [.07, .07] | .08  |
| Study 2                |          |        |        |     |     |                |      |
| Initial                | 988.56   | 221    | < .001 | .84 | .89 | .09 [.08, .09] | .08  |
| W/ cov.                | 682.44   | 219    | < .001 | .90 | .93 | .07 [.06, .07] | .07  |
| W/o FL                 | 677.79   | 213    | < .001 | .90 | .93 | .07 [.07, .07] | .08  |
| Study 3                |          |        |        |     |     |                |      |
| Initial                | 346.92   | 146.52 | < .001 | .75 | .77 | .08 [.07, .08] | .12  |
| W/o FL                 | 323.85   | 129.87 | < .001 | .79 | .81 | .08 [.07, .08] | .11  |
| <b>Best items</b>      |          |        |        |     |     |                |      |
| Initial                | 911.34   | 110    | < .001 | .78 | .82 | .13 [.13, .14] | .13  |
| W/ cov.                | 458.41   | 110    | < .001 | .90 | .92 | .09 [.08, .09] | .11  |
| W/o FL                 | 255.02   | 98     | < .001 | .96 | .97 | .06 [.06, .07] | .07  |
| Study 2                |          |        |        |     |     |                |      |
| Initial                | 961.17   | 119    | < .001 | .81 | .85 | .12 [.12, .13] | .11  |
| W/ cov.                | 477.78   | 118    | < .001 | .91 | .93 | .08 [.08, .08] | .09  |
| W/o FL                 | 349.62   | 104    | < .001 | .94 | .96 | .07 [.06, .08] | .07  |
| Study 3                |          |        |        |     |     |                |      |
| Initial                | 248.54   | 88.79  | < .001 | .74 | .76 | .09 [.08, .09] | .13  |
| W/o FL                 | 191.12   | 72.66  | < .001 | .81 | .83 | .08 [.07, .09] | .11  |

Note: Initial = the initial conceptualization of the model; W/ cov = the model with a covariance term between negative affect and stress; W/o FL = the model without financial literacy
